# Supplementary material for: Bio-acclimatization of rooted mini-cuttings of Arabica F1 hybrid coffee var. Starmaya through soil amelioration with biochar derived from poultry manure
Source: Research Square preprint supplement (doi:10.21203/rs.3.rs-7964682/v1), 2025-10-30
Supplement: Supplementary file 1 [file d6d3e13cc44374b52a4d41ab.docx]

**Supplemental File 1: Raw Data of Experimental Units**

This table presents the raw data collected from all 24 experimental units (replications) at 90 days after planting.

| **Rep** | **Segment** | **Season** | **Rooting Percentage (RP) (%)** | **Survival Rate (SR) (%)** | **Mean Root Number (MRN)** | **Longest Root Length (LRL) (cm)** | **Root Dry Weight (RDW) (mg)** | **Shoot Dry Weight (SDW) (mg)** | **Root-to-Shoot Ratio (RSR)** | **SPAD Value** | **Final Height (cm)** | **Stem Diameter (mm)** |
| --- | --- | --- | --- | --- | --- | --- | --- | --- | --- | --- | --- | --- |
| 1 | A | WWS | 74 | 88 | 5.0 | 4.4 | 3.4 | 14.5 | 0.23 | 30.5 | 6.1 | 2.0 |
| 2 | A | WWS | 78 | 90 | 5.3 | 4.7 | 3.6 | 15.2 | 0.24 | 31.8 | 6.4 | 2.1 |
| 3 | A | WWS | 75 | 86 | 4.9 | 4.2 | 3.3 | 14.0 | 0.24 | 30.1 | 5.9 | 1.9 |
| 4 | A | WWS | 77 | 89 | 5.2 | 4.8 | 3.7 | 15.5 | 0.24 | 31.2 | 6.3 | 2.0 |
| 1 | **M** | **WWS** | **90** | **95** | **7.4** | **6.2** | **5.3** | **20.2** | **0.26** | **35.1** | **8.5** | **2.9** |
| 2 | **M** | **WWS** | **86** | **92** | **6.9** | **5.7** | **4.9** | **18.9** | **0.26** | **34.2** | **8.0** | **2.7** |
| 3 | **M** | **WWS** | **92** | **96** | **7.6** | **6.4** | **5.5** | **21.0** | **0.26** | **35.8** | **8.9** | **3.0** |
| 4 | **M** | **WWS** | **86** | **93** | **6.9** | **6.0** | **4.7** | **18.0** | **0.26** | **34.5** | **7.8** | **2.6** |
| 1 | B | WWS | 70 | 85 | 4.5 | 4.3 | 3.1 | 13.5 | 0.23 | 29.8 | 5.5 | 1.9 |
| 2 | B | WWS | 65 | 81 | 4.0 | 3.8 | 2.8 | 12.0 | 0.23 | 28.5 | 5.0 | 1.8 |
| 3 | B | WWS | 72 | 87 | 4.6 | 4.5 | 3.3 | 14.2 | 0.23 | 30.2 | 5.7 | 2.0 |
| 4 | B | WWS | 69 | 84 | 4.2 | 4.0 | 2.8 | 12.8 | 0.22 | 29.0 | 5.3 | 1.8 |
| 1 | A | CDS | 60 | 75 | 4.1 | 3.7 | 3.0 | 12.5 | 0.24 | 26.5 | 5.2 | 1.7 |
| 2 | A | CDS | 55 | 70 | 3.5 | 3.2 | 2.5 | 10.8 | 0.23 | 25.1 | 4.8 | 1.6 |
| 3 | A | CDS | 59 | 74 | 4.0 | 3.6 | 2.9 | 12.1 | 0.24 | 26.0 | 5.1 | 1.8 |
| 4 | A | CDS | 58 | 76 | 4.1 | 3.5 | 2.8 | 11.9 | 0.24 | 27.0 | 5.0 | 1.7 |
| 1 | M | CDS | 73 | 85 | 6.0 | 5.5 | 4.5 | 16.5 | 0.27 | 31.9 | 6.9 | 2.4 |
| 2 | M | CDS | 70 | 82 | 5.5 | 5.0 | 4.0 | 14.8 | 0.27 | 30.5 | 6.5 | 2.3 |
| 3 | M | CDS | 75 | 87 | 6.1 | 5.8 | 4.8 | 17.5 | 0.27 | 32.5 | 7.2 | 2.5 |
| 4 | M | CDS | 69 | 84 | 5.6 | 5.1 | 3.5 | 12.8 | 0.27 | 31.2 | 6.3 | 2.2 |
| 1 | B | CDS | 30 | 50 | 2.0 | 2.4 | 1.8 | 8.0 | 0.23 | 24.5 | 3.8 | 1.4 |
| 2 | B | CDS | 35 | 58 | 2.4 | 2.8 | 2.2 | 9.5 | 0.23 | 26.0 | 4.2 | 1.6 |
| 3 | B | CDS | 32 | 53 | 2.1 | 2.5 | 1.9 | 8.5 | 0.22 | 25.0 | 4.0 | 1.5 |
| 4 | B | CDS | 30 | 51 | 2.0 | 2.3 | 1.7 | 7.8 | 0.22 | 24.1 | 3.7 | 1.4 |
